1 **Detection of circulating extracellular mRNAs by modified small RNA-**  
2 **sequencing analysis**

3  
4 Kemal M. Akat<sup>1</sup>, Youngmin A. Lee<sup>1</sup>, Arlene Hurley<sup>2</sup>, Pavel Morozov<sup>1</sup>, Klaas E.A. Max<sup>1</sup>, Miguel Brown<sup>1</sup>,  
5 Kimberly Bogardus<sup>1</sup>, Anuoluwapo Sopeyin<sup>1</sup>, Kai Hildner<sup>3</sup>, Thomas Diacovo<sup>4</sup>, Markus F. Neurath<sup>3</sup>,  
6 Martin Borggreffe<sup>5</sup>, and Thomas Tuschl<sup>1</sup>

7  
8 Short title: Detection of extracellular mRNAs by sRNA-seq

9  
10 <sup>1</sup>Laboratory of RNA Molecular Biology, The Rockefeller University, New York

11 <sup>2</sup>Centre for Translational Science, The Rockefeller University, New York

12 <sup>3</sup>Department of Medicine 1, University Hospital Erlangen, University of Erlangen-Nuremberg, Kussmaul  
13 Campus for Medical Research, Erlangen, Germany

14 <sup>4</sup>Departments of Pediatrics and Cell Biology and Pathology, Columbia University Medical Center

15 <sup>5</sup>First Department of Medicine, University Medical Center Mannheim (UMM), Faculty of Medicine  
16 Mannheim, University of Heidelberg, European Center for AngioScience (ECAS), and DZHK (German  
17 Center for Cardiovascular Research) partner site Heidelberg/Mannheim, Mannheim, Germany.

18

19 **Correspondence:**

20 Kemal Akat

21 The Rockefeller University

22 1230 York Avenue, Box# 186

23 New York, NY 10065

24 P: 212-327-7645

25 F: 212-327- 7652

26 kakat@rockefeller.edu

27 **Abstract**

28 Extracellular mRNAs (ex-mRNAs) potentially supersede extracellular miRNAs (ex-miRNAs) and other  
29 RNA classes as biomarkers. Here, we present a comprehensive extracellular RNA (exRNA) study in  
30 human blood circulation based on conventional small RNA-sequencing (sRNA-seq) and sRNA-seq after  
31 T4 polynucleotide kinase (PNK) end-treatment of total exRNA isolated from serum and platelet-poor  
32 EDTA, ACD, and heparin plasma. Applying strict criteria for read mapping and annotation, we found that  
33 compared to conventional sRNA-seq PNK-treatment increased the detection of informative ex-mRNAs  
34 reads up to 50-fold. Based on captured ex-mRNAs from healthy individuals, we concluded that the  
35 exRNA pool is dominated by hematopoietic cells and platelets, with additional contribution from the  
36 liver. About 60% of the 15- to 42-nt long reads originated from the coding sequences, in a pattern  
37 reminiscent of ribosome-profiling studies for high abundance transcripts. Blood sample type had a  
38 considerable influence on the exRNA profile. The number of detected distinct ex-mRNA transcripts  
39 ranged from on average ~350 to 1100 in the different plasma types. In serum, additional transcripts from  
40 neutrophils and hematopoietic cells increased this number to ~2300. For EDTA and ACD, in particular,  
41 we found evidence of destabilization of mRNA and non-coding RNA ribonucleoprotein complexes. In a  
42 proof-of-concept study, we compared patients with acute coronary syndrome (ACS) to healthy controls.  
43 The improved tissue resolution of ex-mRNAs after PNK-treatment enabled us to detect a neutrophil-  
44 signature in ACS that escaped detection in an ex-miRNA analysis. Thus, ex-mRNAs provide superior  
45 resolution for the study of exRNA changes in vivo and ex vivo. They can be readily studied by sRNA-seq  
46 after T4 PNK end-treatment.

47

## 48 **Introduction**

49 Extracellular RNAs (exRNAs) in biofluids were described as early as the first half of the 20th century<sup>1</sup>  
50 but underwent a more recent renaissance with the detection of circulating miRNAs<sup>2</sup>. Despite the high  
51 nuclease activity in biofluids, miRNAs (ex-miRNAs) remain detectable due to protection by tightly  
52 bound RNA-binding proteins and/or inclusion in microvesicles<sup>2-5</sup>. In recent years, especially with the  
53 advancement of RNA-sequencing (RNA-seq), an extensive body of research accumulated regarding the  
54 role of extracellular miRNAs in a broad range of medical conditions and cardiovascular diseases,  
55 including advanced heart failure<sup>6</sup> and myocardial infarction<sup>7</sup>.

56  
57 Ex-miRNAs are remarkably stable in circulation, and we recently showed that distinct ex-miRNA  
58 signatures can be followed for months<sup>8</sup>. However, a general limitation of ex-miRNAs is the relatively low  
59 number of miRNA genes with only few tissue specific members<sup>9</sup>. Alterations of ex-miRNAs are often  
60 difficult to interpret biologically as they either affect ubiquitously expressed or low-abundance miRNAs  
61 without a clearly identifiable source tissue. In contrast, the number of mRNA genes in the human genome  
62 is at least an order of magnitude higher<sup>10</sup> providing a much better tissue and functional resolution for  
63 physiological conditions or disease states. While RNA-sequencing (RNA-seq) potentially offers the most  
64 comprehensive interrogation of ex-mRNAs and their changes lack of robust protocols and challenges in  
65 the analysis of fragmented, short reads hampered their study.

66  
67 Technical challenges in exRNA profiling encompass the very low amounts of RNA in body fluids, and  
68 the influence of anticoagulants used for blood collection, increasing the likelihood for batch effects or  
69 spurious findings<sup>11,12</sup>. The type of blood sample used for RNA isolation can substantially influence the  
70 stability of certain ribonucleoprotein (RNPs) complexes and associated RNAs. A striking example for  
71 differential stability of RNPs with different anticoagulants is the loss of 5' tRNA fragments using  
72 magnesium-ion-chelating EDTA or citrate salts for blood collection<sup>6,13</sup>. While it seems likely that these  
73 routinely used chelators for blood collections will impact the stability of other extracellular RNPs, the  
74 overall extent in which the sample types influence the exRNA profile remains unknown.

75  
76 By design sRNA-seq cDNA protocols enrich for miRNAs, which carry 5' phosphate and 3' hydroxyl  
77 groups. However, in body fluids other classes of RNAs, including potentially mRNAs, most likely exist  
78 as degradation products due to the high nuclease activity<sup>8</sup>. RNA degradation products possess 5' OH ends  
79 as well as 2' or 3' phosphate or 2',3' cyclic phosphate termini. These termini are incompatible with  
80 sRNA-seq, and fragments of those RNAs will largely escape detection. Enzymatic treatment of RNA ends  
81 by T4 polynucleotide kinase (PNK) rescues RNA fragments devoid of the necessary termini and has been

82 used for different RNA-seq based applications including exRNA studies<sup>14,15</sup>. However, an effect on ex-  
83 mRNA capture has not been shown thus far.

84

85 Here, we used a recently published RNA isolation protocol that quantitatively recovers exRNAs<sup>8</sup>, and  
86 combine T4 PNK RNA end-modification with sRNA-seq and stringent read annotation criteria to  
87 demonstrate effective and informative capture of ex-mRNAs. We investigated blood samples with  
88 different commonly used anticoagulants to identify confounding factors, and finally tested the potential of  
89 ex-mRNAs in a proof-of-concept cohort of patients presenting with an acute coronary syndrome.

## 90 **Methods**

### 91 *Sample procurement*

92 Blood was collected from healthy volunteers and from patients evaluated for acute coronary syndrome at  
93 The Rockefeller University and Mannheim University Medical Centre, respectively, by the first author.  
94 Human tissue samples for bulk mRNA-seq were obtained from the National Disease Research  
95 Interchange (Philadelphia), or from biopsies or discarded surgical waste. Sample procurement was  
96 approved by the institutional review boards of all participating institutions. All participants gave written  
97 informed consent, and the studies were approved by the IRBs of the participating institutions.

### 98 *RNA isolation*

99 ExRNA was isolated from 425  $\mu$ l cell-free serum or platelet-depleted plasma using a customized RNA  
100 isolation protocol developed to minimize residual nuclease activity<sup>8</sup>; the RNA was purified using silica  
101 columns. Cellular or tissue total RNA was extracted using TRIzol with an additional phenol/chloroform  
102 extraction step and concentrated by alcohol precipitation.

### 103 *PNK treatment of total exRNA*

104 After elution from the silica column, half of the isolated total exRNA was used directly for sRNA-seq,  
105 and the other half treated with T4 PNK in a total reaction volume of 20  $\mu$ l for 30 min at 37 °C followed  
106 by re-purification and elution of the PNK treated RNA using the same silica column, and then subjected  
107 to sRNA-seq library preparation.

### 108 *Small RNA-seq*

109 sRNA-seq cDNA library preparation was done as described<sup>16</sup> but size selecting from 19- to 45-nt. Long  
110 mRNAseq of cells and tissues was done using the Illumina Stranded mRNA-seq TruSeq protocol

111 following the manufacturer's instructions. Sequencing was conducted in the Genomics Core Facility at  
112 The Rockefeller University.

### 113 ***Bioinformatics analysis***

#### 114 *Read annotation*

115 Read processing and annotation for small RNA-seq of serum and plasma samples was done as described<sup>17</sup>  
116 with modifications for PNK-treated samples. Long RNA-seq reads from tissues or cells were aligned to  
117 the human genome build 38 using the STAR aligner<sup>18</sup> and quantified using the featureCounts<sup>19</sup> program  
118 based on Ensembl release 82.

#### 119 *Data analysis and statistics*

120 Differential analysis, clustering, and other downstream analyses were done in the R statistical language  
121 and Bioconductor packages. Other statistical tests are indicated in text and figures where appropriate. If  
122 not stated otherwise, results with a p value < 5% were considered significant (Benjamini-Hochberg  
123 adjusted for all RNA-seq comparisons).

#### 124 *Tissue specificity score*

125 An RNA-seq expression atlas comprised of representative tissues was used to calculate a tissue-  
126 specificity score to identify the source tissue of circulating mRNAs<sup>10</sup>.

### 127 ***Clinical laboratory parameters***

128 Standard clinical laboratory assays were performed by the Central Laboratories of the University Medical  
129 Centre Mannheim, Mannheim, Germany, and Memorial Sloan Kettering Cancer Centre, New York, NY,  
130 USA.

## 131 **Results**

### 132 ***PNK treatment of exRNA improves the capture of mRNA fragments by small RNA-seq***

133 To test if PNK treatment improves capture of ex-mRNA fragments we performed sRNA-seq comparing  
134 untreated to PNK-treated total exRNA input from the same donors. Different anticoagulants were used to  
135 assess their influence on the exRNA profile (Fig. 1).

136

137 Plasma and serum were collected from six healthy volunteers. Collection tubes for plasma samples  
138 contained the divalent-metal-ion-chelating EDTA and ACD salts or the polyanion heparin. All plasma  
139 samples were platelet-depleted, and total exRNA was recovered by our recently published isolation  
140 protocol which preserves RNA integrity and quantitatively recovers exRNA<sup>8</sup>. Multiplexed sRNA-seq  
141 libraries were generated minimizing batch effects (libraries 1-4; Fig. 1, Supplementary Data 1).

142  
143 More than 95% of the processed reads were 12- to 42-nt in length. Such short reads impose challenges for  
144 confident transcript assignment due to multi-mapping. For conventional sRNA-seq, i.e. miRNA studies,  
145 this is minimized by hierarchical mapping and requiring a minimum read length of 16-nt<sup>17</sup>. Hierarchical  
146 mapping ensures that more abundant RNAs like rRNAs and tRNAs take precedence over less abundant  
147 classes like mRNAs and miRNAs if a sequence matches to more than one RNA class. To arrive at a  
148 comprehensive assessment, we initially retained reads <16-nt. With that, over 80% of reads mapped to  
149 established classes of human RNAs and human genome with the expected enrichment for miRNAs in the  
150 untreated samples (Fig. 1B). The most apparent difference after PNK-treatment was the increase in the  
151 rRNA fraction. A residual 3-15% of reads mapped to the *E. coli* genome, and ~1% to bacterial expression  
152 plasmids and diatoms (Supplementary Data 1). Bacterial RNA is a common contaminant in  
153 recombinantly produced enzymes used for library preparation and residual diatom RNA exists in  
154 commercial silica matrices used for nucleic acid isolation. In standard RNA-seq applications using higher  
155 amounts of input RNA, these sequences do not influence the results but they can contribute a sizeable  
156 fraction of sequence reads in low input samples like body fluids<sup>6,8</sup>.

157  
158 Ex-mRNA reads comprised 6.5 to 20% with some enrichment after PNK-treatment in EDTA and ACD  
159 plasma but not in heparin plasma or serum (Fig. 1B). Further review of read alignments, however, showed  
160 that untreated samples collected more mRNA reads with 1 or 2 mismatches, i.e. inflating the mRNA read  
161 count by inclusion of low-confidence reads (Supplementary Data 2). As expected, reads <15-nt had a high  
162 fraction of multi-mapping (Supplementary Fig. 1). Therefore, our final ex-mRNA analysis was restricted  
163 to perfectly mapping reads (0 mismatch) 15-nt or longer with at most two mapping locations. The latter  
164 was necessary to account for the identical coding sequences of the hemoglobin paralogs HBA1 and  
165 HBA2 that would otherwise be underrepresented.

166  
167 Using these annotation criteria PNK-treatment unambiguously increased the percentage of ex-mRNA  
168 reads and even more the number of unique transcripts captured. Compared to untreated samples, in PNK-  
169 treated samples the mRNA read count increased ~4-fold in ACD samples and ~9-fold in all other sample  
170 types (Fig. 1C). Requiring 5 unique reads per mRNA and donor sample, we captured an average (min,  
171 max) of 2313 (452, 4634), 583 (162, 1192), 350 (75, 625), and 1108 (591, 1760) distinct mRNA

172 transcripts in serum, EDTA plasma, ACD plasma, and heparin plasma samples, respectively. This  
173 compared to only 46 (2, 182), 33 (1, 86), 27 (5, 70), and 43 (0, 140) distinct mRNAs in the corresponding  
174 untreated samples (P value < 8e-09, Wilcoxon rank sum test), representing a 13- to 50-fold increase.

#### 175 ***Ex-mRNAs in circulation originate mostly from the coding sequences and not UTRs***

176 It has been previously reported, that ex-mRNAs in cell culture media mostly originate from the 3' UTR of  
177 mRNA transcripts<sup>20</sup>. Review of read alignments in our study, however, indicated that most of the  
178 ex-mRNA reads originated from the transcript coding sequence (CDS), a pattern that was only observable  
179 in PNK-treated samples due to better transcript coverage. Read distribution and read length were  
180 reminiscent of ribosome-profiling data, which indicated that ex-mRNA fragments are ribosome protected  
181 and circulate as polysome or monosome complexes. This observation was confirmed by a metagene  
182 analysis that was based on an average of 12,789 to 16,486 ex-mRNA transcripts depending on sample  
183 type. This showed that ~60% of the reads originated from the CDS and ~30% from the 3' UTR (Fig. 2).

#### 184 ***Anticoagulants have a widespread effect on the exRNA profile***

185 The anticoagulants we studied are the predominant ones used to collect blood samples in clinical practice  
186 and for research purposes. All of them influence blood cells *ex vivo*<sup>21-23</sup>, and heparin  
187 may not be removed sufficiently by common extraction protocols and as a result interfere with  
188 downstream applications<sup>24</sup>. This is especially relevant if patient populations are studied that often receive  
189 high doses of heparin.

190  
191 We therefore next looked at how sample type influenced the measured exRNA composition for both the  
192 untreated and PNK-treated samples. We noted the previously reported destabilization of 5' tRNA  
193 fragments in EDTA and ACD samples (Supplementary Fig. 2)<sup>6,13</sup>, and alterations in miRNA composition  
194 between serum and platelet-depleted EDTA plasma<sup>12</sup>. In an ANOVA-like comparison we observed  
195 abundance differences for 86 miRNAs in the untreated samples and of 1,458 mRNA transcripts in the  
196 PNK-treated samples between the three plasma types and serum (Supplementary Data 3 and 4). Serum  
197 generally had a higher abundance of ex-miRNAs (e.g. miR-223 and -142) and ex-mRNAs (e.g. S100A8)  
198 enriched in myeloid cells and platelets. In a gene set analysis ex-mRNAs abundant in serum were  
199 associated with inflammation and leukocyte activation whereas plasma ex-mRNAs were more related to  
200 general cellular processes like translation (Supplementary Data 5). Although there was a high degree of  
201 similarity between the exRNA profiles of EDTA and ACD plasma, as expected from their mechanism of  
202 action (Supplementary Fig. 3B), there were distinctive differences as well. For instance, EDTA plasma  
203 had increased levels of erythropoietic transcripts, i.e. miR-451(1) and hemoglobin mRNAs, compared to



204 all other samples. ACD had 3- to 4-fold higher levels of miR-150(1), a lymphocyte-restricted miRNA,  
205 than the other sample types (Supplementary Fig. 3A, Supplementary Data 3 and 4).

206

207 The destabilizing effect of the chelating reagents, ACD and EDTA, on ribonucleoprotein complexes was  
208 not restricted to tRNAs. Both altered read coverage signatures of other RNAs. Human small nuclear  
209 RNAs U1 and U2 snRNAs are ~164-nt and ~190-nt non-coding RNAs, respectively, which assemble with  
210 proteins into small nuclear ribonucleoproteins (snRNPs). Biochemical studies demonstrated that U1 and  
211 U2 possess core structures that are relatively resistant to nuclease digestion<sup>25</sup>. In high magnesium  
212 conditions several U1 domains are protected from nuclease digestion whereas in low magnesium  
213 conditions, i.e. after the addition of EDTA or similar chelating reagents, only the core region remained  
214 relatively resistant to digestion. Our sRNA-seq data agreed well with these earlier observations  
215 (Supplementary Fig. 3C). In addition, the coverage of the more protected core region was 4- to 8-fold  
216 lower in EDTA and ACD plasma, respectively, than in the other two sample types. There was no  
217 difference in read coverage patterns for snRNAs U2, U4, U5, and U6 or the large ribosomal subunits, 18S  
218 and 28S, between the different sample types.

### 219 ***Hematopoietic cells, platelets, and liver are the major sources of exRNAs in healthy individuals***

220 We next sought to identify contributing tissue sources to the exRNA pool in the physiological state. We  
221 generated a polyA mRNA-seq tissue atlas comprising major human cell and tissue types and calculated a  
222 tissue specificity score (TSS)<sup>10</sup> for all of the 19,810 mRNAs as defined in Ensembl release 82  
223 (Supplementary Data 6). Genes restricted to a few tissues or cell types had a TSS greater than 3, e.g.  
224 aldolase B (ALDOB) expressed in liver and kidney, while classic marker genes like albumin (ALB) or  
225 cardiac troponin T (TNNT2) had a TSS greater than 4.

226

227 A total of 3,167 ex-mRNAs entered comparative analysis, and of those 144 had a TSS > 3 (102 >3 but <4,  
228 42 >4; Supplementary Data 7), therefore being most informative regarding tissue of origin. About 30% of  
229 the 144 mRNAs were most abundant in neutrophils, 10% in liver, and 5% each in red blood cells (RBCs),  
230 platelets, and skeletal muscle. Conversely, when we compared the 1,000 highest expressed mRNAs for  
231 each tissue in the atlas to the 3,167 ex-mRNAs, we found a much higher fraction of the top 1,000  
232 transcripts from RBCs, platelets, neutrophils, PBMC, and monocytes captured in circulation than from  
233 any of the other tissue (Fig. 3 and 4, Supplementary Fig. 4, Supplementary Data 8). Our annotation  
234 criteria led to the detection of certain highly tissue-specific genes from other tissues, e.g. MYBPC3  
235 (myocardium), SFTPB (lung), or MIOX (kidney; Supplementary Fig. 4) in some serum or plasma sample  
236 types. However, the underlying reads were repetitive and short and therefore highly suggestive of  
237 annotation artefacts.



238

239 We noted, again, a clear difference between sample types. In EDTA and ACD plasma we detected 12% to  
240 21% of the top 1,000 hematopoietic mRNAs. This percentage increased to 27% to 49% in heparin, and  
241 38% to 81% in serum. Particularly striking was this difference for neutrophils, for which we detected  
242 17%, 49%, and 81% of the 1,000 most highly expressed transcripts in ACD, EDTA, and serum,  
243 respectively, as ex-mRNAs (Fig. 4, Supplementary Fig. 4 Supplementary Data 8). The increase of  
244 ex-mRNAs in serum compared to the other samples is likely related to in vitro neutrophil degranulation  
245 and apoptosis during coagulation. On the mRNA level this is much more pronounced for neutrophil than  
246 platelets transcripts, of which we detected 35% in heparin and 42% in serum. Although miRNAs have  
247 been reported as markers for platelet activation<sup>12</sup>, our data suggest that neutrophils also contribute to  
248 coagulation-dependent miRNA abundance changes.

249

250 In summary, these results indicated that hematopoietic cells, platelets, and the liver are main contributors  
251 to the ex-mRNA profile and based on our data there was little support that other solid tissues contribute  
252 substantially.

### 253 ***RNA end-modification increases the diagnostic potential of exRNA in disease***

254 To evaluate the clinical potential of ex-mRNAs in patients we studied exRNA changes in a pilot cohort of  
255 patients with an acute coronary syndrome (ACS; n = 6) and age- and gender-matched healthy controls (n  
256 = 10; Supplementary Data 1 and 9). All patients had evidence of myocardial necrosis based on elevated  
257 cardiac troponin I levels, highly-sensitive and routinely used marker for myocardial damage. Patients with  
258 myocardial injury provided a good proof-of-concept cohort as the myocardium is one of the few tissues  
259 expressing tissue-specific miRNAs (myomirs miR-208a, -208b, and -499), which have been shown to be  
260 elevated in the circulation of these patients. In comparison to the controls the ACS group had higher white  
261 blood cell counts (Supplementary Data 9 and 10).

262

263 Because the ACS group received high doses of heparin before sample collection as part of , all patient and  
264 control samples were collected in heparin plasma to avoid any biases associated with different  
265 anticoagulants as described before. Two small RNA-seq libraries were generated from untreated (library  
266 5) and PNK-treated (library 6) total RNA (Supplementary Fig. 5). Unsupervised hierarchical clustering of  
267 the 3'-adapter spike-in small RNAs did not separate the two groups, arguing against any potential bias  
268 due to residual heparin in the samples (Supplementary Fig. 6).

269

270 In the differential analysis 18 miRNAs were altered in the untreated samples, 11 higher and 7 lower in  
271 ACS than controls (Fig. 5A; Supplementary Data 11). The myocardium-specific miRNA miR-208b(1) in

272 the ACS group was 17-fold higher than in the controls, the other two myocardium-specific miRNAs miR-  
273 208a (FDR 0.07%) and miR-499 (FDR 0.15%) were elevated 8-fold in ACS. These changes were in line  
274 with release due to myocardial injury and in magnitude similar to what we reported for patients in  
275 advanced heart failure<sup>6</sup>, and again supporting that any heparin-associated bias did not substantially  
276 influence this comparison. Individual myeloid-enriched miRNAs were elevated in ACS as well, e.g. miR-  
277 223(1), while platelet miRNAs in general were not changed (Fig. 5A).

278

279 In agreement with our previous results after PNK-treatment, it improved the detection of distinct ex-  
280 mRNAs 30-fold, with an average (min, max) of 1124 (47, 4825) ex-mRNAs captured in the PNK-treated  
281 samples compared to an average of 38 (6, 313) in the untreated samples. Differential analysis identified  
282 209 changed mRNA transcripts, 167 higher and 42 lower in ACS than controls. Most prominent was a  
283 marked increase in neutrophil transcripts in ACS (Fig. 5B, Supplementary Data 12) while platelet  
284 transcripts like the highly specific PF4 and PPBP were unchanged between the two groups (Fig. 5C). The  
285 top 6 elevated mRNA fragments in the ACS group by FDR (Fig. 5D) were IFITM2 (4.2-fold, TSS 2.25),  
286 MGAM (10-fold, TSS 4.3), CXCR2 (4.5-fold, TSS 4.1), H3F3A (3.6-fold, TSS 0.74), GCA (3.8-fold,  
287 TSS 3.2), and S100A8 (3.7-fold, TSS 3.2) all of which highly expressed in neutrophils (Supplementary  
288 Data 6) and many specifically expressed in this cell type. The reads of the released neutrophil transcripts  
289 originated again mainly from the CDS of the transcripts (Fig. 5E). In contrast to our observations with  
290 myocardium-specific miRNAs, we did not detect any myocardial mRNAs in circulation.

291

292 Taken together, these data support that ex-mRNAs a neutrophil signature in the ACS group with a release  
293 of ribosome-associated transcripts, a change not detectable on the miRNA level.

## 294 **Discussion**

295 Here, we showed that mRNA fragments in circulation (ex-mRNAs) can be efficiently captured by T4  
296 polynucleotide kinase (PNK) end-treatment of total extracellular RNA (exRNA) followed by sRNA-seq.  
297 Ex-mRNAs provide superior tissue and functional resolution for most conditions compared to other RNA  
298 classes because of the higher number of comparatively well annotated, highly expressed tissue-restricted  
299 transcripts. Tissue-specific ex-miRNAs, in selected cases, offer complementary information.

300

301 Ex-miRNAs have been widely studied as biomarkers in many types of diseases and conditions<sup>6,7,26,27</sup>.

302 They perform well in the detection of tissue damage of organs with tissue-specific miRNAs like the liver  
303 (miR-122)<sup>28</sup> or the heart (myomirs)<sup>6,7</sup>. Individual miRNAs alone or in combination are also used for risk  
304 prediction for chronic conditions<sup>27</sup>, and characteristic ex-miRNA changes have been shown to be stable  
305 over months even in the absence of detectable illness<sup>8</sup>. But the precise tissue-source or etiology of such

306 differences based on the ex-miRNA profile remain unclear. Many tissues do not possess specifically-  
307 expressed miRNAs, and measurements of ubiquitously or weakly expressed miRNAs in biofluids are  
308 prone to misinterpretation.

309  
310 Patients with acute coronary syndrome (ACS) represented a good benchmark population to evaluate our  
311 analysis of ex-mRNAs given the consistently reported elevations of myocardium-specific miRNAs  
312 (myomirs) in circulation<sup>6,7</sup>. As expected, myomirs were elevated in ACS but aside from these changes  
313 few alterations were detectable between ACS and healthy controls on the ex-miRNA level. However, the  
314 ACS group had a characteristic neutrophil ex-mRNA signature in circulation, i.e. elevated levels of  
315 neutrophil-enriched and -specific genes. Although this finding needs validation in larger cohorts and  
316 could have been confounded by the higher leukocyte count in the ACS group, the results are in line with  
317 the increasing recognition of inflammation and neutrophil activation for atherosclerotic disease.  
318 Endothelial damage and neutrophil activation have been linked to thrombus formation in animal studies<sup>29</sup>,  
319 and neutrophils in atherosclerotic plaques are detectable in animal models as well as human samples<sup>30</sup>.  
320 Irrespective of the reason for the neutrophil signature in the ACS cohort, i.e. an inflammatory response to  
321 ACS or due to higher neutrophil counts, the results clearly emphasize the superior tissue resolution of ex-  
322 mRNAs compared to ex-miRNAs. The lack of detectable myocardial ex-mRNAs in any of the samples  
323 used in this study is most likely due to the low sequencing depth of ex-mRNAs caused mainly by large of  
324 rRNA fractions but differential stability of ex-miRNAs and ex-mRNA fragments likely contributes<sup>5</sup>.

325  
326 While our study did not address different mechanisms of exRNA release or the different compartments of  
327 exRNAs currently discussed, a few findings suggest that ex-mRNAs and probably a large part of all  
328 exRNA circulate within polysome complexes. First, in ex-mRNAs transcripts sequenced with good  
329 coverage, i.e. high abundance transcripts, read length (~28-nt) and read distribution across the transcripts  
330 were reminiscent of sequencing data from ribosome profiling studies<sup>31</sup>. Second, the loss of 5' tRNA  
331 halves in EDTA and ACD samples<sup>6,13</sup> is consistent with loss of protection by the RNA-binding protein  
332 ZNF598 after polysome disassembly due to Mg<sup>2+</sup> chelation. We have recently shown that ZNF598 binds  
333 tRNAs and translating ribosomes<sup>32</sup>, and the circulating tRNA halves correspond precisely to the region  
334 protected by the ZNF598. Chelation of Mg<sup>2+</sup> by EDTA, traditionally used experimentally for that  
335 purpose<sup>25,33</sup>, and ACD in blood collection tubes will lead to disassembly of polysomes render the  
336 associated tRNAs vulnerable to nuclease digestion. The more widespread effect of RNP destabilization  
337 after Mg<sup>2+</sup> chelation is furthermore evident by loss of RNA fragments from certain regions of U1 RNA,  
338 and overall fewer captured transcripts in EDTA and ACD samples though it ultimately remains unclear  
339 how much ex vivo effects of the different plasma additives on hematopoietic cells contribute to these  
340 differences<sup>21-23</sup>. Aside from the utility to study in vivo changes of exRNAs and to develop diagnostic

341 applications, the discriminatory value of ex-mRNA compared to other RNA classes can also be utilized to  
342 assess such changes and biases related to blood collection and processing, which are well known in  
343 laboratory medicine and of which the effects of EDTA and ACD are the most prominent.

344

345 The finding that most reads originate from the coding sequence and not the UTRs is in contrast to a recent  
346 report by Skog *et al.*<sup>15</sup> and likely due to different sRNA-seq protocols and analysis strategies. In fact,  
347 while Skog *et al.* and Danielson *et al.*<sup>14</sup> used RNA end-treatment with RNA-seq they did not report  
348 enrichment of ex-mRNAs. In our study, strict mapping criteria were necessary to increase the signal-to-  
349 noise ratio for ex-mRNAs.

350 The adoption of exRNAs as clinical biomarkers will require quantitative and reasonably fast assays like  
351 qPCR. However, primer design for short fragments is challenging, and qPCR like other not-sequencing  
352 based assays does not easily allow to verify the amplified signal (i.e. read sequence). The diminutive  
353 amounts of RNA in body fluids increases the risk of introducing biases. For instance, up to 30% of reads  
354 in samples not end-treated with T4 PNK in this study mapped to the plasmid of Rnl2 ligase, which is used  
355 for adapter ligation during the sRNA-seq cDNA preparation. Omitting this plasmid reference from the  
356 mapping hierarchy during sequence read alignments resulted in a substantial amount of plasmid  
357 sequences aligning perfectly to other RNA classes, including mRNA transcripts, even using the most  
358 stringent mapping criteria. Similar considerations will have to be taken into account with different  
359 methods or further refinements, like e.g. using heparinase treatment to reduce possible interference of  
360 heparin with enzymatic reactions, or enzymatic rRNA removal.

361

362 In conclusion, total exRNA PNK-treatment followed by sRNA-seq allows for robust investigation of  
363 ex-mRNA changes for biomarker discovery and other studies. Future method refinements, such as  
364 depletion of rRNA and tRNA fragments, will further increase the potential of this approach.

365 **References**

366

- 367 1. Mandel, P. & Métais, P. Les acides nucléiques du plasma sanguin chez l'homme. *C R Acad Sci III*  
368 **142**, 241-243 (1948).
- 369 2. Mitchell, P. S. et al. Circulating microRNAs as stable blood-based markers for cancer detection.  
370 *Proc Natl Acad Sci U S A* **105**, 10513-10518 (2008).
- 371 3. Arroyo, J. D. et al. Argonaute2 complexes carry a population of circulating microRNAs  
372 independent of vesicles in human plasma. *Proc Natl Acad Sci U S A* **108**, 5003-5008 (2011).
- 373 4. Turchinovich, A., Weiz, L., Langheinz, A. & Burwinkel, B. Characterization of extracellular  
374 circulating microRNA. *Nucleic Acids Res* **39**, 7223-7233 (2011).
- 375 5. Elkayam, E. et al. The Structure of Human Argonaute-2 in Complex with miR-20a. *Cell* **150**, 100-  
376 110 (2012).
- 377 6. Akat, K. M. et al. Comparative RNA-sequencing analysis of myocardial and circulating small  
378 RNAs in human heart failure and their utility as biomarkers. *Proc Natl Acad Sci U S A* **111**, 11151-  
379 11156 (2014).
- 380 7. Corsten, M. F. et al. Circulating MicroRNA-208b and MicroRNA-499 reflect myocardial damage  
381 in cardiovascular disease. *Circ Cardiovasc Genet* **3**, 499-506 (2010).
- 382 8. Max, K. E. A. et al. Human plasma and serum extracellular small RNA reference profiles and their  
383 clinical utility. *Proc Natl Acad Sci U S A* **115**, E5334-E5343 (2018).
- 384 9. Landgraf, P. et al. A mammalian microRNA expression atlas based on small RNA library  
385 sequencing. *Cell* **129**, 1401-1414 (2007).
- 386 10. Gerstberger, S., Hafner, M. & Tuschl, T. A census of human RNA-binding proteins. *Nat Rev Genet*  
387 **15**, 829-845 (2014).
- 388 11. Giraldez, M. D. et al. Comprehensive multi-center assessment of small RNA-seq methods for  
389 quantitative miRNA profiling. *Nat Biotechnol* (2018).
- 390 12. Willeit, P. et al. Circulating MicroRNAs as Novel Biomarkers for Platelet Activation. *Circ Res* **112**,  
391 595-600 (2013).
- 392 13. Dhahbi, J. M. et al. 5' tRNA halves are present as abundant complexes in serum, concentrated in  
393 blood cells, and modulated by aging and calorie restriction. *BMC Genomics* **14**, 298 (2013).
- 394 14. Danielson, K. M., Rubio, R., Abderazzaq, F., Das, S. & Wang, Y. E. High Throughput Sequencing  
395 of Extracellular RNA from Human Plasma. *PLoS One* **12**, e0164644 (2017).
- 396 15. Skog, J. et al. Glioblastoma microvesicles transport RNA and proteins that promote tumour growth  
397 and provide diagnostic biomarkers. *Nat Cell Biol* **10**, 1470-1476 (2008).
- 398 16. Hafner, M. et al. Barcoded cDNA library preparation for small RNA profiling by next-generation  
399 sequencing. *Methods* **58**, 164-170 (2012).

- 400 17. Farazi, T. A. et al. Bioinformatic analysis of barcoded cDNA libraries for small RNA profiling by  
401 next-generation sequencing. *Methods* **58**, 171-187 (2012).
- 402 18. Dobin, A. et al. STAR: ultrafast universal RNA-seq aligner. *Bioinformatics* **29**, 15-21 (2013).
- 403 19. Liao, Y., Smyth, G. K. & Shi, W. featureCounts: an efficient general purpose program for assigning  
404 sequence reads to genomic features. *Bioinformatics* **30**, 923-930 (2014).
- 405 20. Wei, Z. et al. Coding and noncoding landscape of extracellular RNA released by human glioma  
406 stem cells. *Nat Commun* **8**, 1145 (2017).
- 407 21. Brunialti, M. K., Kallás, E. G., Freudenberg, M., Galanos, C. & Salomao, R. Influence of EDTA  
408 and heparin on lipopolysaccharide binding and cell activation, evaluated at single-cell level in  
409 whole blood. *Cytometry* **50**, 14-18 (2002).
- 410 22. Duvigneau, J. C. et al. Heparin and EDTA as anticoagulant differentially affect cytokine mRNA  
411 level of cultured porcine blood cells. *J Immunol Methods* **324**, 38-47 (2007).
- 412 23. Shalekoff, S., Page-Shipp, L. & Tiemessen, C. T. Effects of anticoagulants and temperature on  
413 expression of activation markers CD11b and HLA-DR on human leukocytes. *Clin Diagn Lab*  
414 *Immunol* **5**, 695-702 (1998).
- 415 24. Ukita, T., Terao, T. & Irie, M. Inhibition of pancreatic ribonuclease-I activity by heparin. *J*  
416 *Biochem* **52**, 455-457 (1962).
- 417 25. Reveillaud, I., Lelay-Taha, M. N., Sri-Widada, J., Brunel, C. & Jeanteur, P. Mg<sup>2+</sup> induces a sharp  
418 and reversible transition in U1 and U2 small nuclear ribonucleoprotein configurations. *Mol Cell*  
419 *Biol* **4**, 1890-1899 (1984).
- 420 26. Zeller, T. et al. Assessment of microRNAs in patients with unstable angina pectoris. *Eur Heart J*  
421 **35**, 2106-2114 (2014).
- 422 27. Karakas, M. et al. Circulating microRNAs strongly predict cardiovascular death in patients with  
423 coronary artery disease-results from the large AtheroGene study. *Eur Heart J* **38**, 516-523 (2017).
- 424 28. Ward, J. A. et al. Circulating microRNA profiles in human patients with acetaminophen  
425 hepatotoxicity or ischemic hepatitis. *Proc Natl Acad Sci U S A* **111**, 12169-12174 (2014).
- 426 29. Franck, G. et al. Flow Perturbation Mediates Neutrophil Recruitment and Potentiates Endothelial  
427 Injury via TLR2 in Mice: Implications for Superficial Erosion. *Circ Res* **121**, 31-42 (2017).
- 428 30. Lee, T. D. et al. CAP37, a novel inflammatory mediator: its expression in endothelial cells and  
429 localization to atherosclerotic lesions. *Am J Pathol* **160**, 841-848 (2002).
- 430 31. Ingolia, N. T., Ghaemmaghami, S., Newman, J. R. & Weissman, J. S. Genome-wide analysis in  
431 vivo of translation with nucleotide resolution using ribosome profiling. *Science* **324**, 218-223  
432 (2009).
- 433 32. Garzia, A. et al. The E3 ubiquitin ligase and RNA-binding protein ZNF598 orchestrates ribosome  
434 quality control of premature polyadenylated mRNAs. *Nat Commun* (2017).

435 33. Penman, S., Vesco, C. & Penman, M. Localization and kinetics of formation of nuclear  
436 heterodisperse RNA, cytoplasmic heterodisperse RNA and polyribosome-associated messenger  
437 RNA in HeLa cells. *J Mol Biol* **34**, 49-60 (1968).

#### 438 **Funding**

439 This work was supported by the National Institutes of Health (grant numbers UH3 TR000933, UH2  
440 AR06768902 to T.T.), and in part by grant UL1 TR000043 from the National Centre for Advancing  
441 Translational Sciences (NCATS), National Institutes of Health (NIH) Clinical and Translational Science  
442 Award (CTSA) program.

#### 443 **Acknowledgements**

444 We thank the Rockefeller Genomics Resource Centre for performing the sequencing, and Tasos Gogakos  
445 from the Tuschl laboratory for scientific input and helpful discussions.

446

#### 447 **Conflict-of-interest disclosure**

448 Thomas Tuschl is a co-founder and adviser to Alnylam Pharmaceuticals. All other authors have no  
449 conflict of interest to declare.



450 **Figures**

**A**

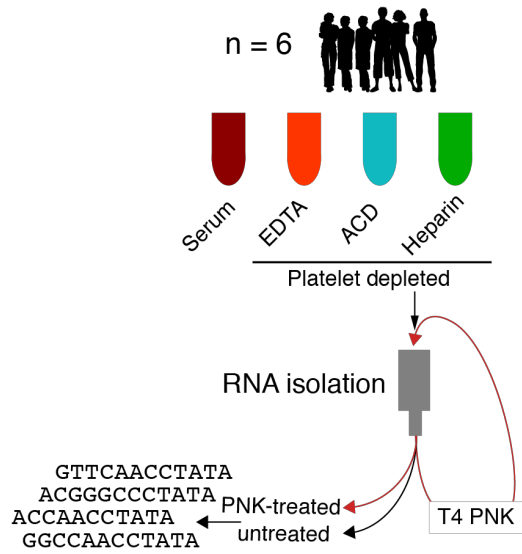

**B**

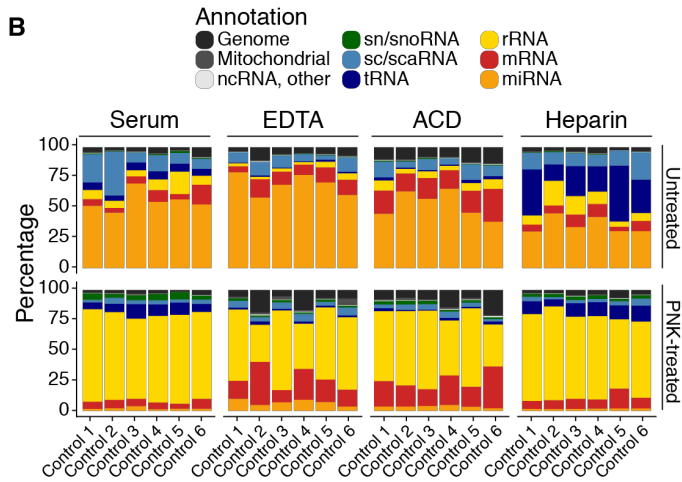

**C**

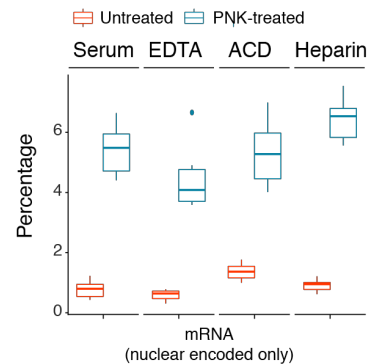

451

452

453 **Fig. 1. Treatment of total extracellular RNA with T4 polynucleotide kinase (T4 PNK) followed by**  
 454 **small RNA-sequencing (sRNA-seq).** (A) Total RNA was isolated from 450  $\mu$ l serum or platelet-depleted  
 455 EDTA, acid citrate dextrose (ACD), and heparin plasma from 6 healthy individuals and purified using  
 456 silica-based spin columns. Half of the RNA was treated with T4 PNK and re-purified (PNK-treated) and  
 457 multiplexed sRNA-seq libraries were prepared separately for the untreated (libraries 1 and 2) and end-  
 458 treated RNA (libraries 3 and 4). (B) Differences in read annotation in the four sample types for untreated  
 459 RNA and PNK-treated RNA using initial annotation settings (up to 2 mismatches, multi-mapping). (C)  
 460 Differences in nuclear mRNA capture between untreated and PNK-treated RNA using final annotation  
 461 criteria (no mismatch and up to two mapping locations).

462

463

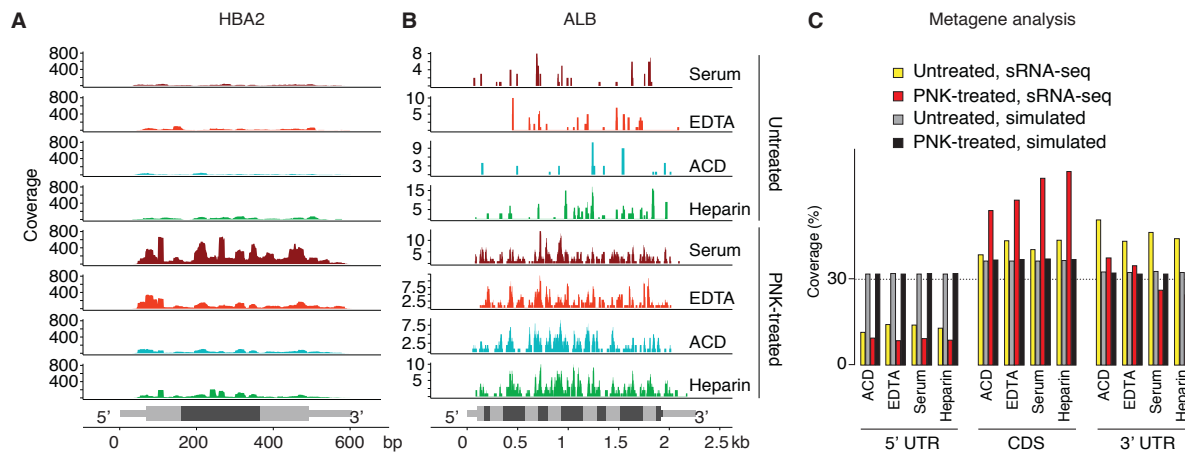

464  
 465 **Fig. 2. Read distribution of reads across mRNA transcripts.** (A, B) Read coverage for the hemoglobin  
 466 A2 transcript (A) and the albumin transcript (B) by sample type for untreated (upper rows) and T4 PNK  
 467 end-treated (lower rows) samples. Exon boundaries (HBA2: 3 exons, ALB: 15 exons) are indicated by  
 468 alternating intensities of grey, and UTRs are distinguished from CDS by thinner bars. (C) Metagene  
 469 analysis with relative read coverage (percentage) across 5' UTRs, CDS, 3' UTRs for untreated and PNK-  
 470 treated samples as well as corresponding data obtained after 100 random simulations (across an average  
 471 of 759 to 3,500 captured transcripts for untreated samples and an average of 2,750 to 16,487 captured  
 472 transcripts for PNK-treated samples depending on sample type).  
 473

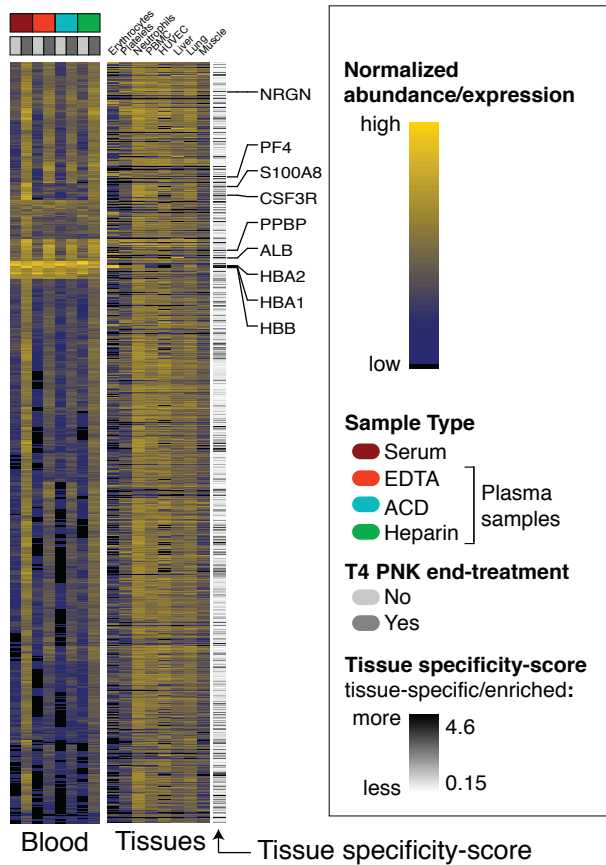

474

475

476

477

478

**Fig. 3. Tissue sources of circulating mRNAs (A).** Heat map with the top the 821 most abundant ex-mRNAs in circulation for untreated and PNK treated (left) together with selected cells or tissues (right). Selected, tissue-specific/enriched miRNAs and mRNAs are labelled together with the tissue-specificity score.

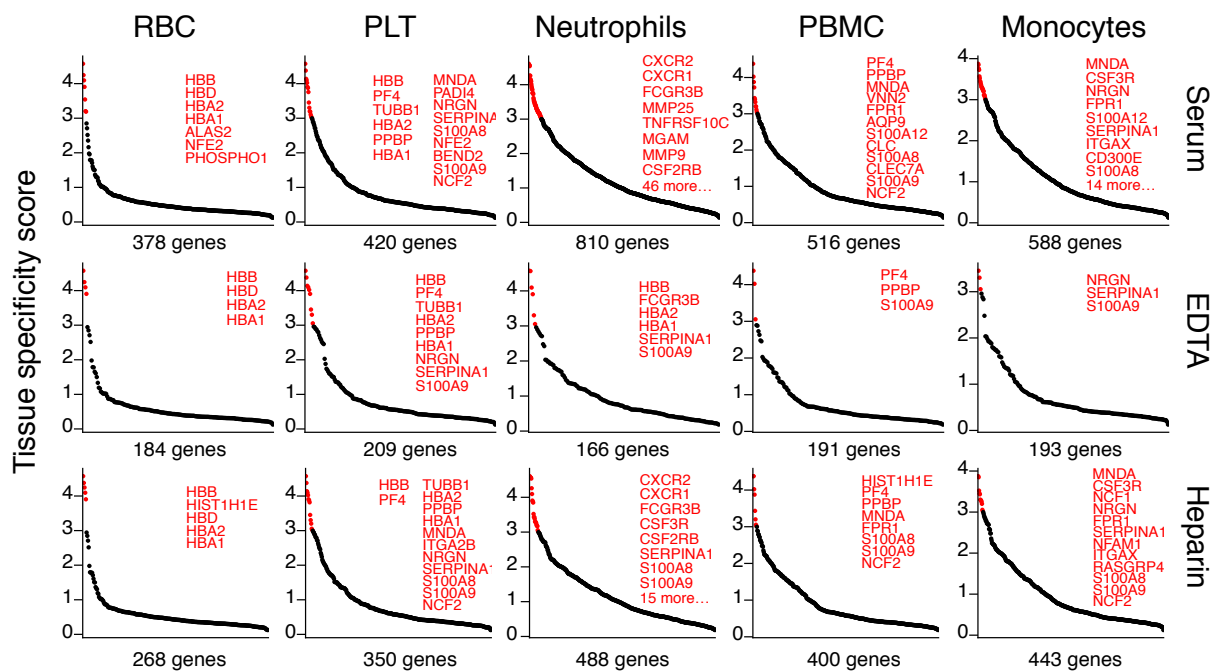

479  
 480 **Fig. 4. Top expressed transcripts from hematopoietic tissues captured in circulation.** The 1,000 most  
 481 abundant nuclear mRNA transcripts from the selected cell types that collected 5 unique or 10 total reads  
 482 in at least 3 of the 6 donors per sample type were considered captured. The captured transcripts (x axis)  
 483 were ordered in descending order by the tissue specificity score (TSS, y axis). Transcripts with a TSS  
 484 greater than 3 were highlighted in red and listed, space permitting.  
 485

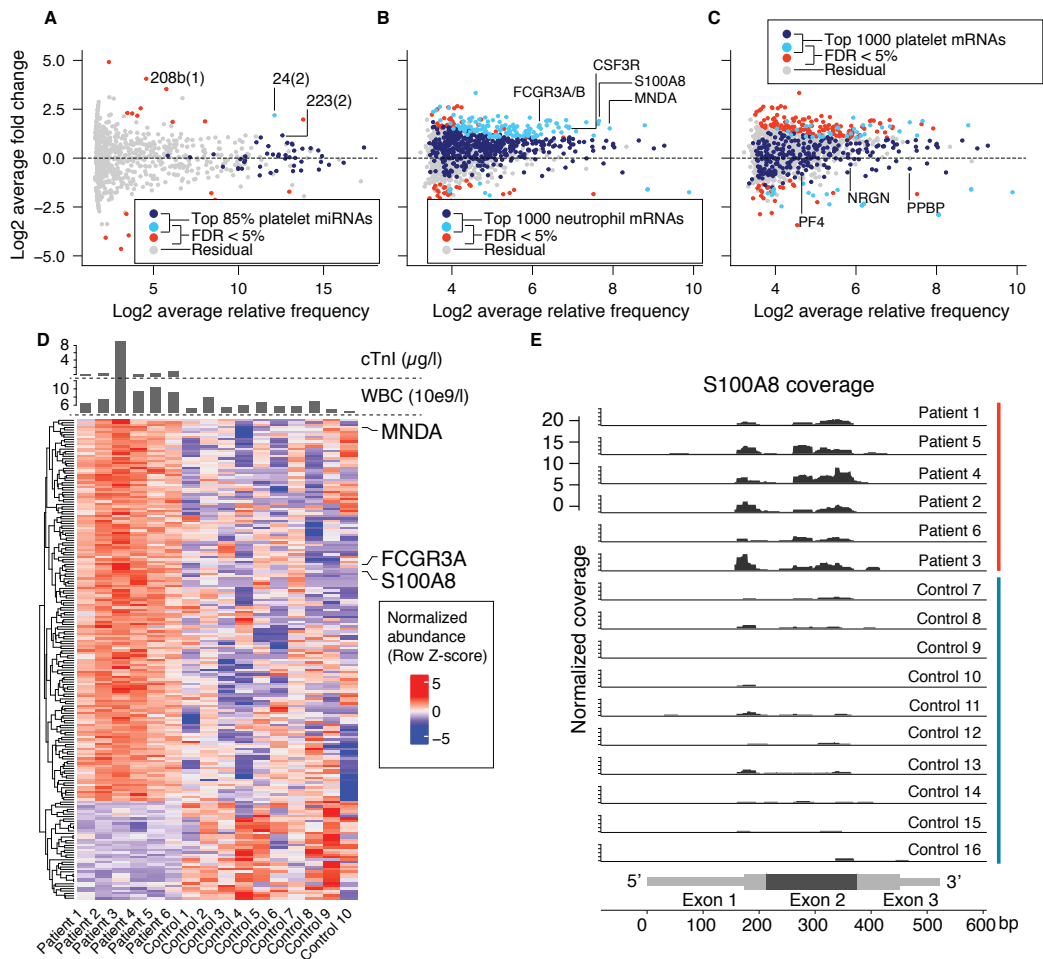

486

487 **Fig. 5. Changes in extracellular mRNAs and miRNAs in patients with ACS compared to controls.**

488 (A) MA plot of ex-miRNAs changes color coding highly expressed miRNAs in platelets defined as the  
 489 top 85% miRNAs. (B, C) MA plot of ex-mRNA changes color coding highly expressed neutrophil genes  
 490 (B) or platelet genes (C). Navy blue: highly expressed and FDR > 5%; orange: highly expressed and FDR  
 491 < 5%; red: not highly expressed and FDR < 5%; grey: all other. Selected transcripts are highlighted: (A)  
 492 myocardium specific miRNAs: 208a(1), 208b(1), 499(1); miRNAs abundant in neutrophils: 185(1),  
 493 24(2), 223(2), or miRNAs specific, 122(1), or typical, 192(1), for liver; (B) mRNA transcripts highly  
 494 enriched in neutrophils or platelets (C). (D) Heat map showing altered ex-mRNAs in the ACS group  
 495 compared to healthy controls. Selected mRNAs are indicated on the right. (E) RNA-seq read coverage of  
 496 the 523-nt S100A8 transcript in ACS group and healthy controls (down-sampled to 600,000 reads).  
 497 Transcript structure indicated at the bottom with the three exons in alternating intensities of grey, and the  
 498 5'/3' UTRs as thin bars.

499

500

501

Supplementary Fig. 1

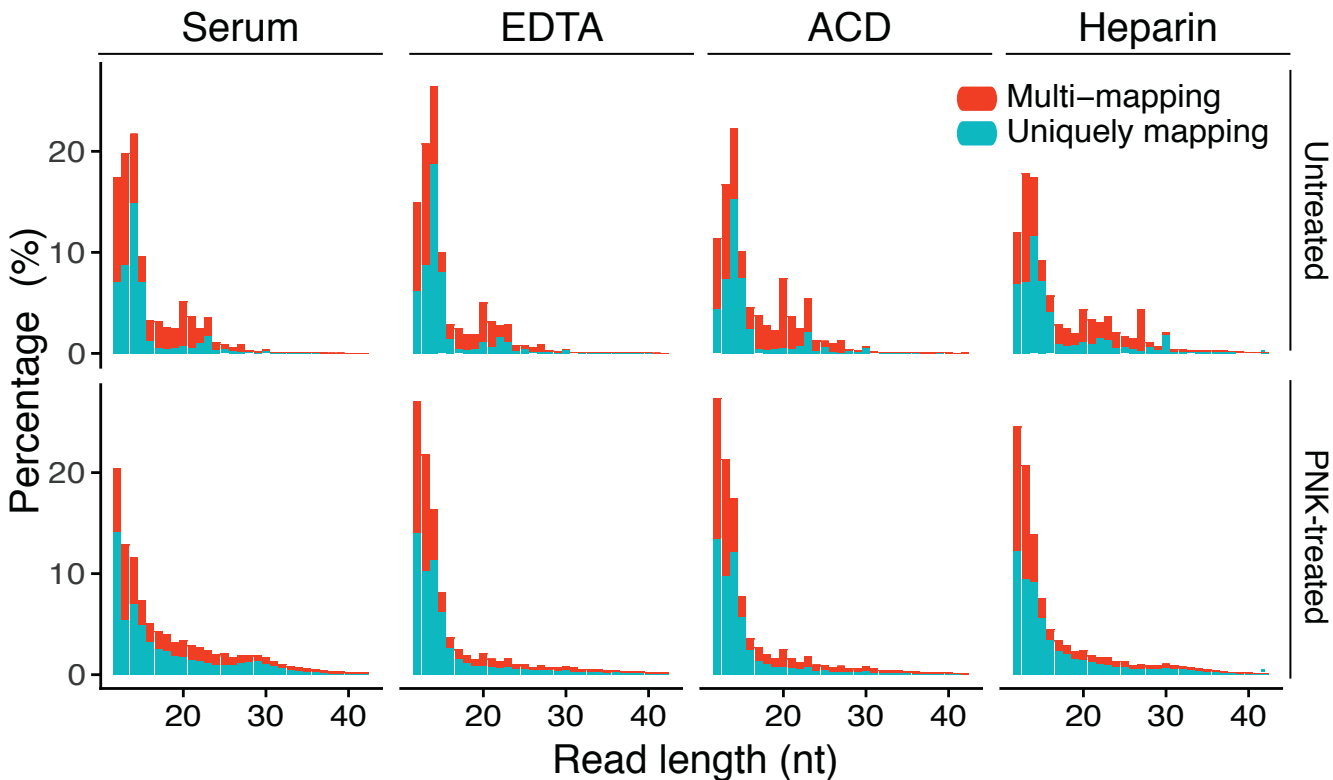

# Supplementary Fig. 2

A

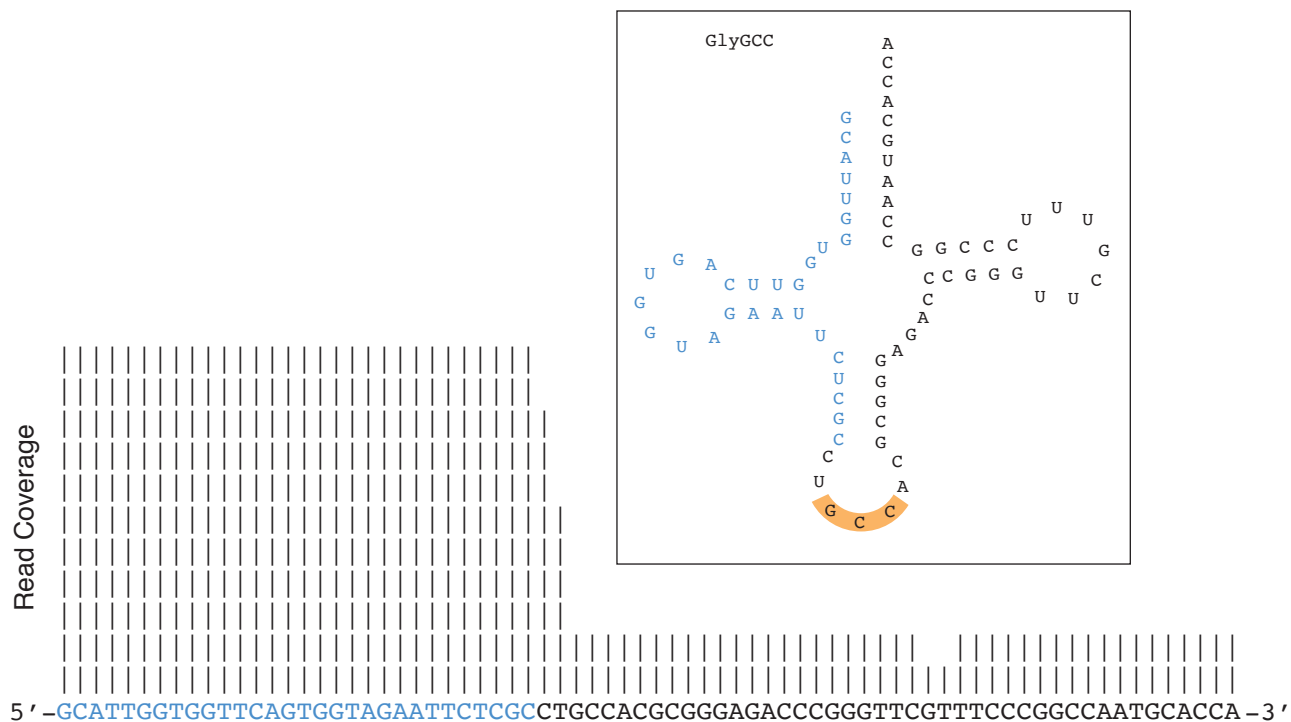

B

| Sequence                         | Count  |
|----------------------------------|--------|
| GCATTGGTGGTTCAGTGGTAGAATTCTCGC   | 914725 |
| GCATTGGTGGTTCAGTGGTAGAATTCTCGCC  | 610267 |
| GCATTGGTGGTTCAGTGGTAGAATTCTCGCCT | 157870 |
| GCATTGGTGGTTCAGTGGTAGAATTCTC     | 83456  |
| GCATTGGTGGTTCAGTGGTAGAATTCTCG    | 75785  |
| †CATTGGTGGTTCAGTGGTAGAATTCTCGC   | 26911  |
| †CATTGGTGGTTCAGTGGTAGAATTCTCGCC  | 17778  |
| TTCAGTGGTAGAATTCTCGC             | 12201  |
| GGTTCAGTGGTAGAATTCTCGC           | 8976   |
| GCATTGGTGGTTCAGTGGTAGAATTCT      | 8415   |



# Supplementary Fig. 3

**A**

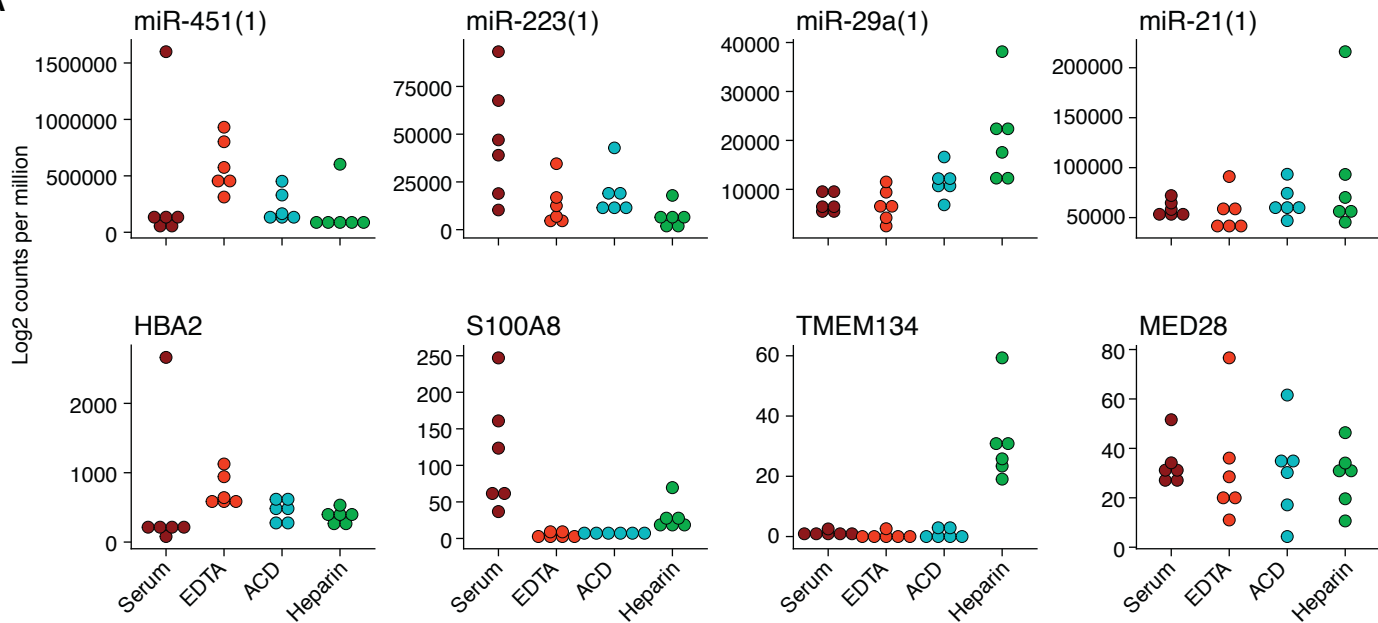

**B**

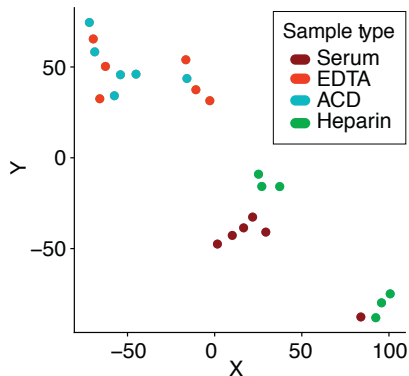

**C**

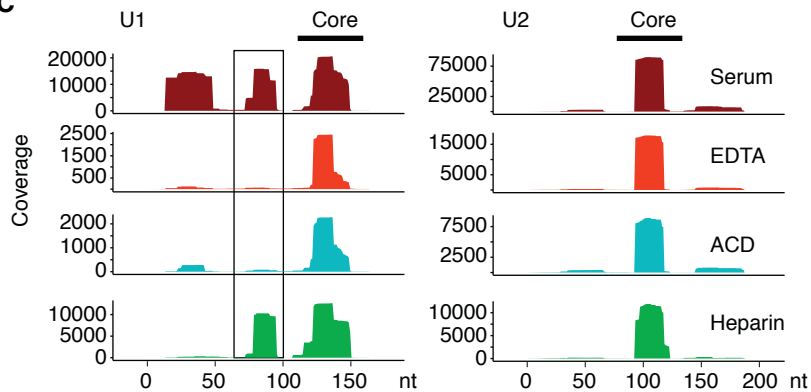

Supplementary Fig. 4

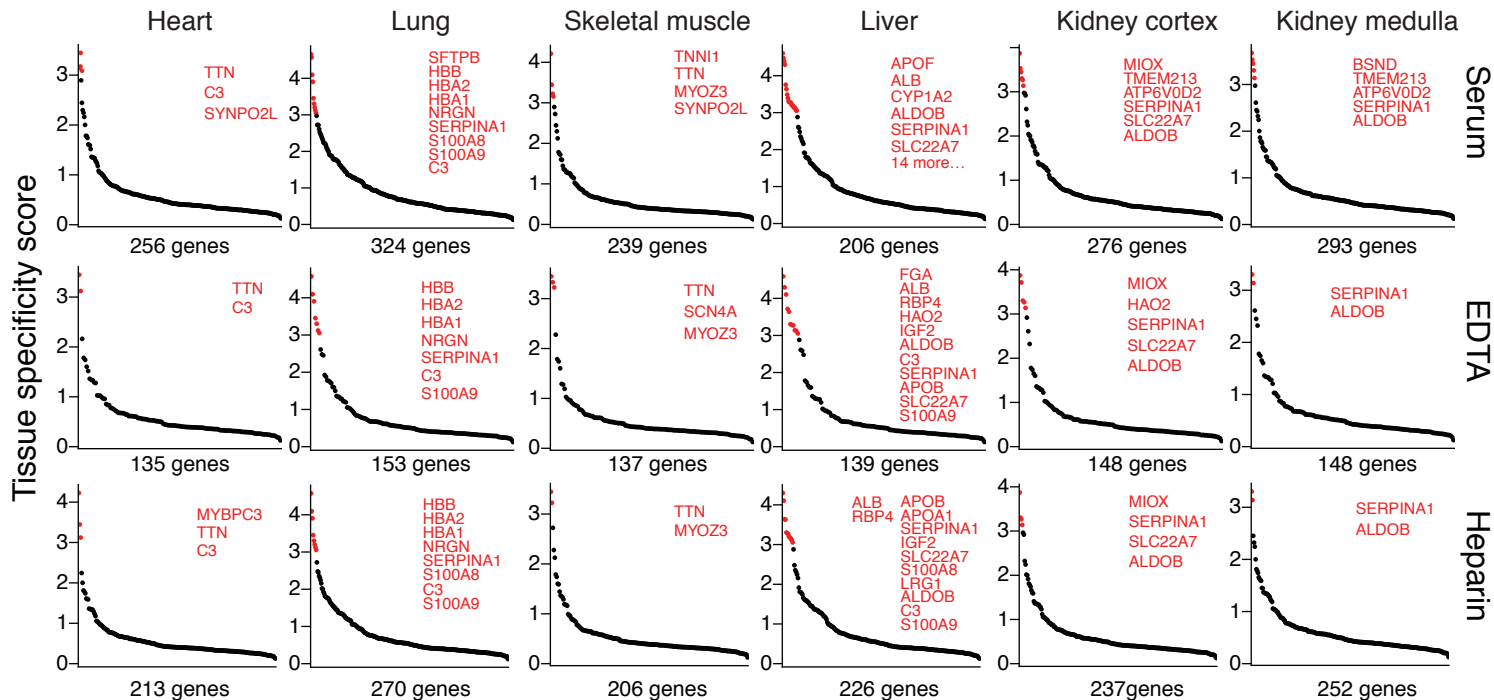

# Supplementary Fig. 5

**A**

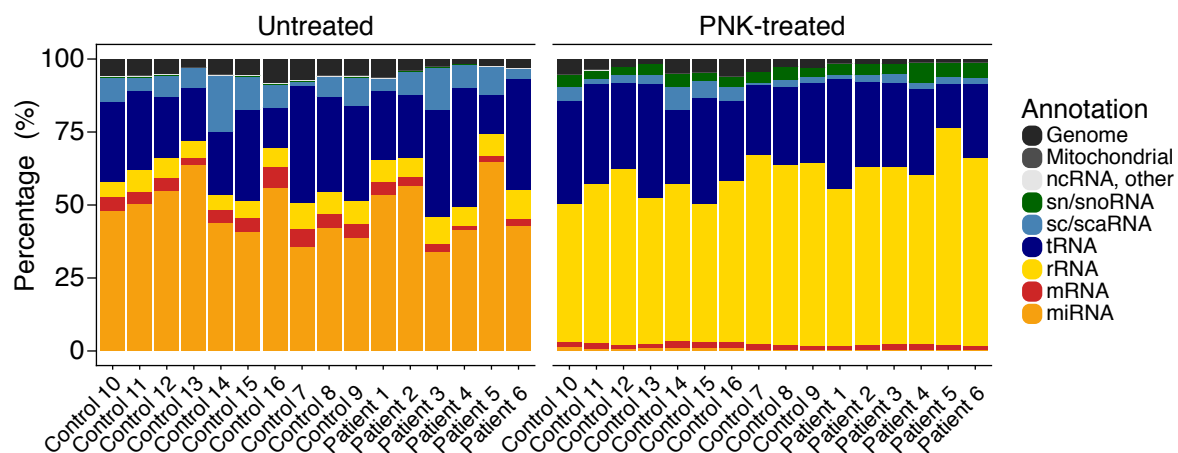

**B**

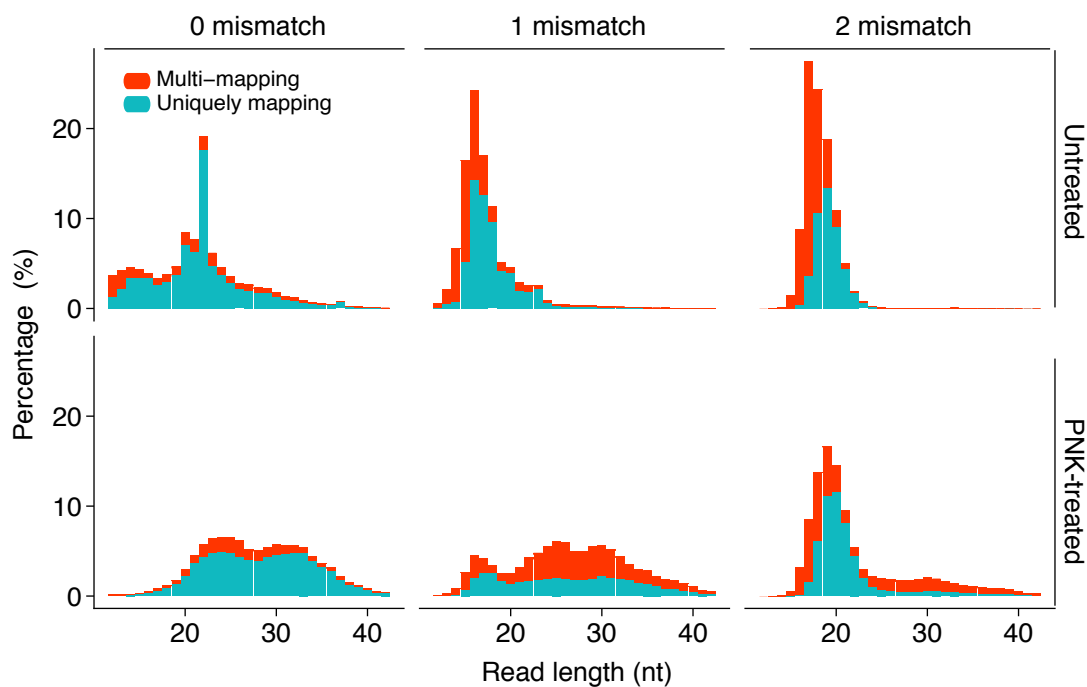

**C**

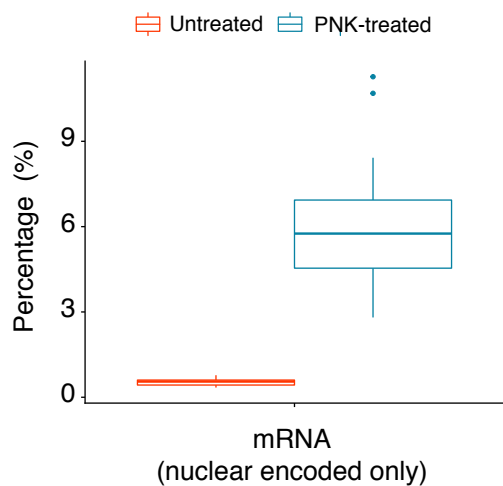

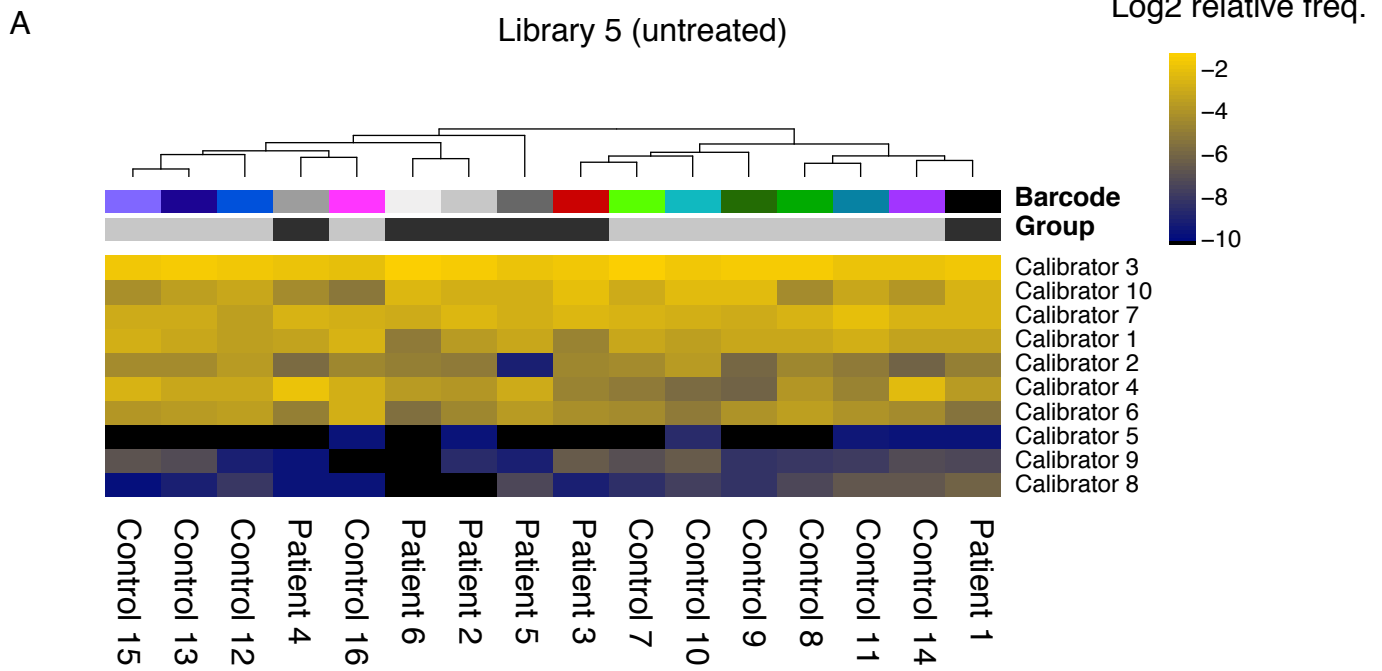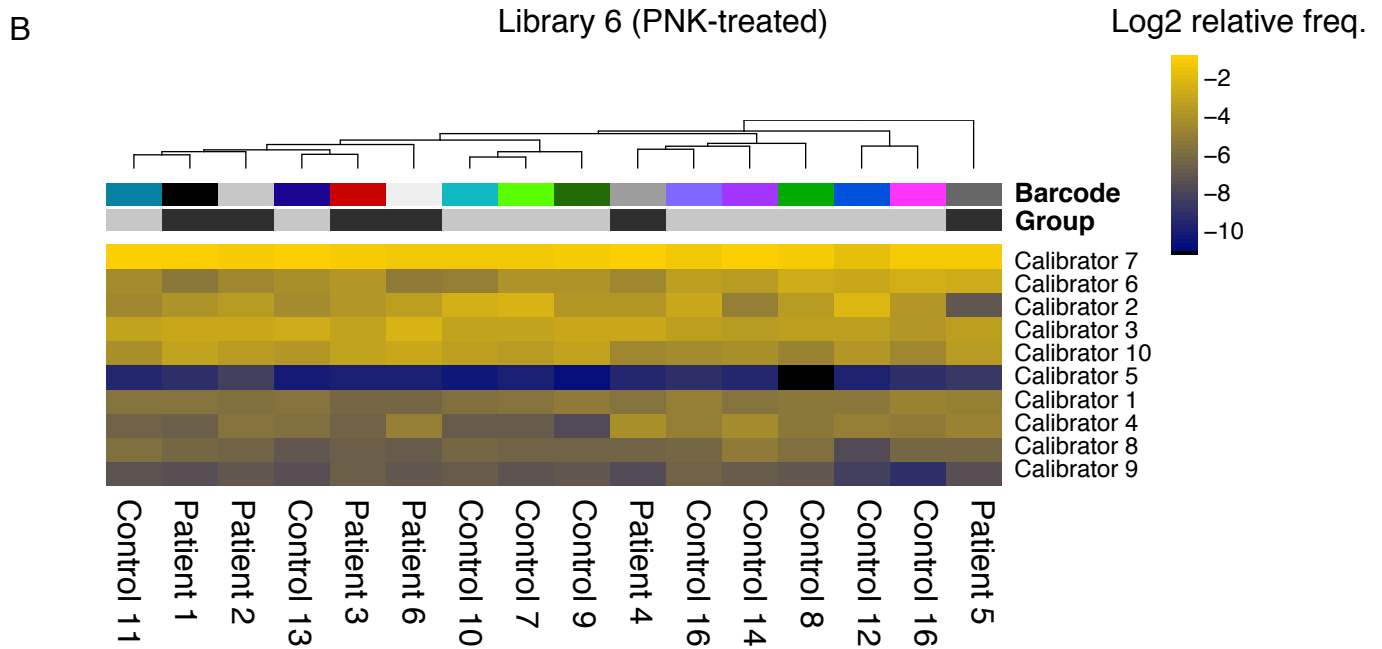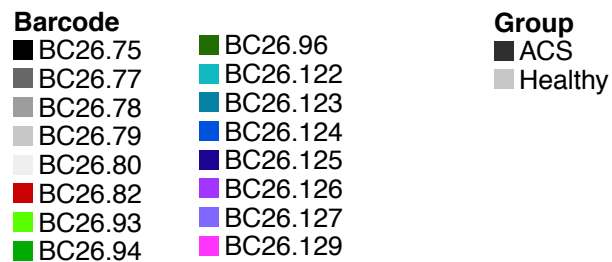

Source: http://biorxiv.org/content/10.1101/507681v1.full.pdf
